# Supplementary material for: Technical phosphoproteomic and bioinformatic tools useful in cancer research
Source: Springer Nature journal article supplement (doi:10.1186/2043-9113-1-26), 2011-01-01
Supplement: 13336_2011_24_MOESM1_ESM.pdf [file 13336_2011_24_MOESM1_ESM.pdf]

**Cell lysate**  
Purified protein complex  
Sample for PTM  
and/or Quantification analysis  
Single protein of interest on a gel

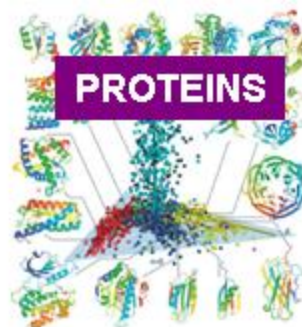

digestion

**PEPTIDE  
mixture**

1

2

**IONIZATION  
(e.g. MALDI, ESI)**

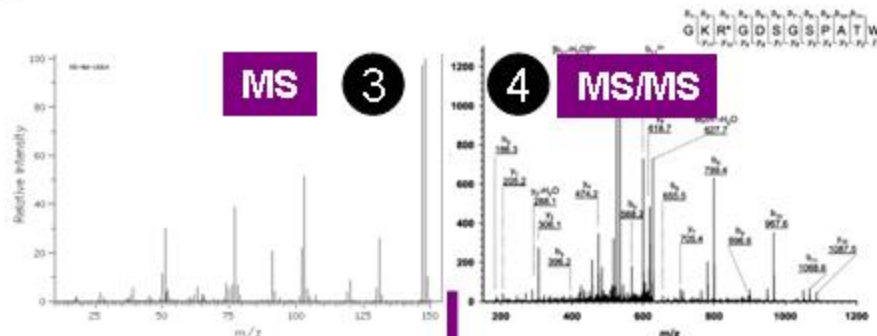

5

6

**Bioinformatic  
Data-analysis**

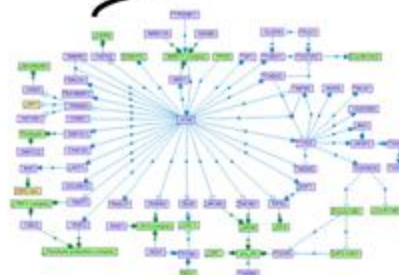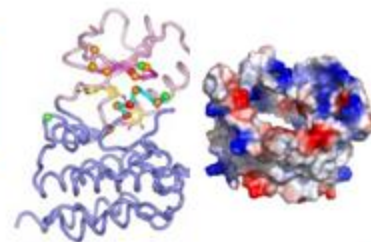

**Protein identification (ID)**  
PTM analysis  
Protein Quantification  
Structural Analysis of proteins  
Cellular composition

- ✓ Conversion-data format
- ✓ Spectrum identification with a search engine
- ✓ Validation of identifications
- ✓ Protein inference
- ✓ Organization in local data managements systems
- ✓ Interpretation and classification of the protein lists
- ✓ Transfer to public data repositories
