# Supplementary material for: Technical phosphoproteomic and bioinformatic tools useful in cancer research
Source: Springer Nature journal article supplement (doi:10.1186/2043-9113-1-26), 2011-01-01

Identification of interacting proteins

1

Searching on structure databases  
(Protein Data Bank)

RCSB  
**PDB**  
PROTEIN DATA BANK

Yes

Present?

No

Structure download

2

3D model for interacting  
unphosphorylated proteins

Generation of 3D models  
(homology-modeling,  
threading, ab-initio)

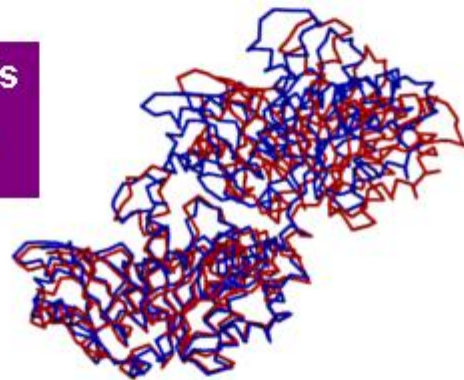

3

Generation of 3D model for  
phosphorylated proteins  
(homology-modeling)

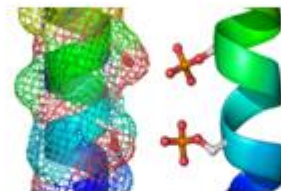

4

Molecular Dynamics to compare the behavior  
of the two models (phospho- vs.  
unphosphorylated proteins)

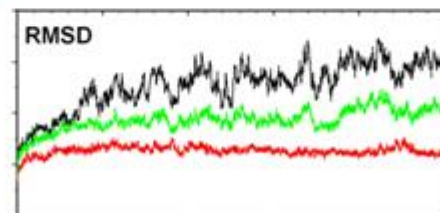

Supplement: 13336_2011_24_MOESM2_ESM.pdf [file 13336_2011_24_MOESM2_ESM.pdf]
