# Supplementary material for: Technical phosphoproteomic and bioinformatic tools useful in cancer research
Source: Springer Nature journal article supplement (doi:10.1186/2043-9113-1-26), 2011-01-01

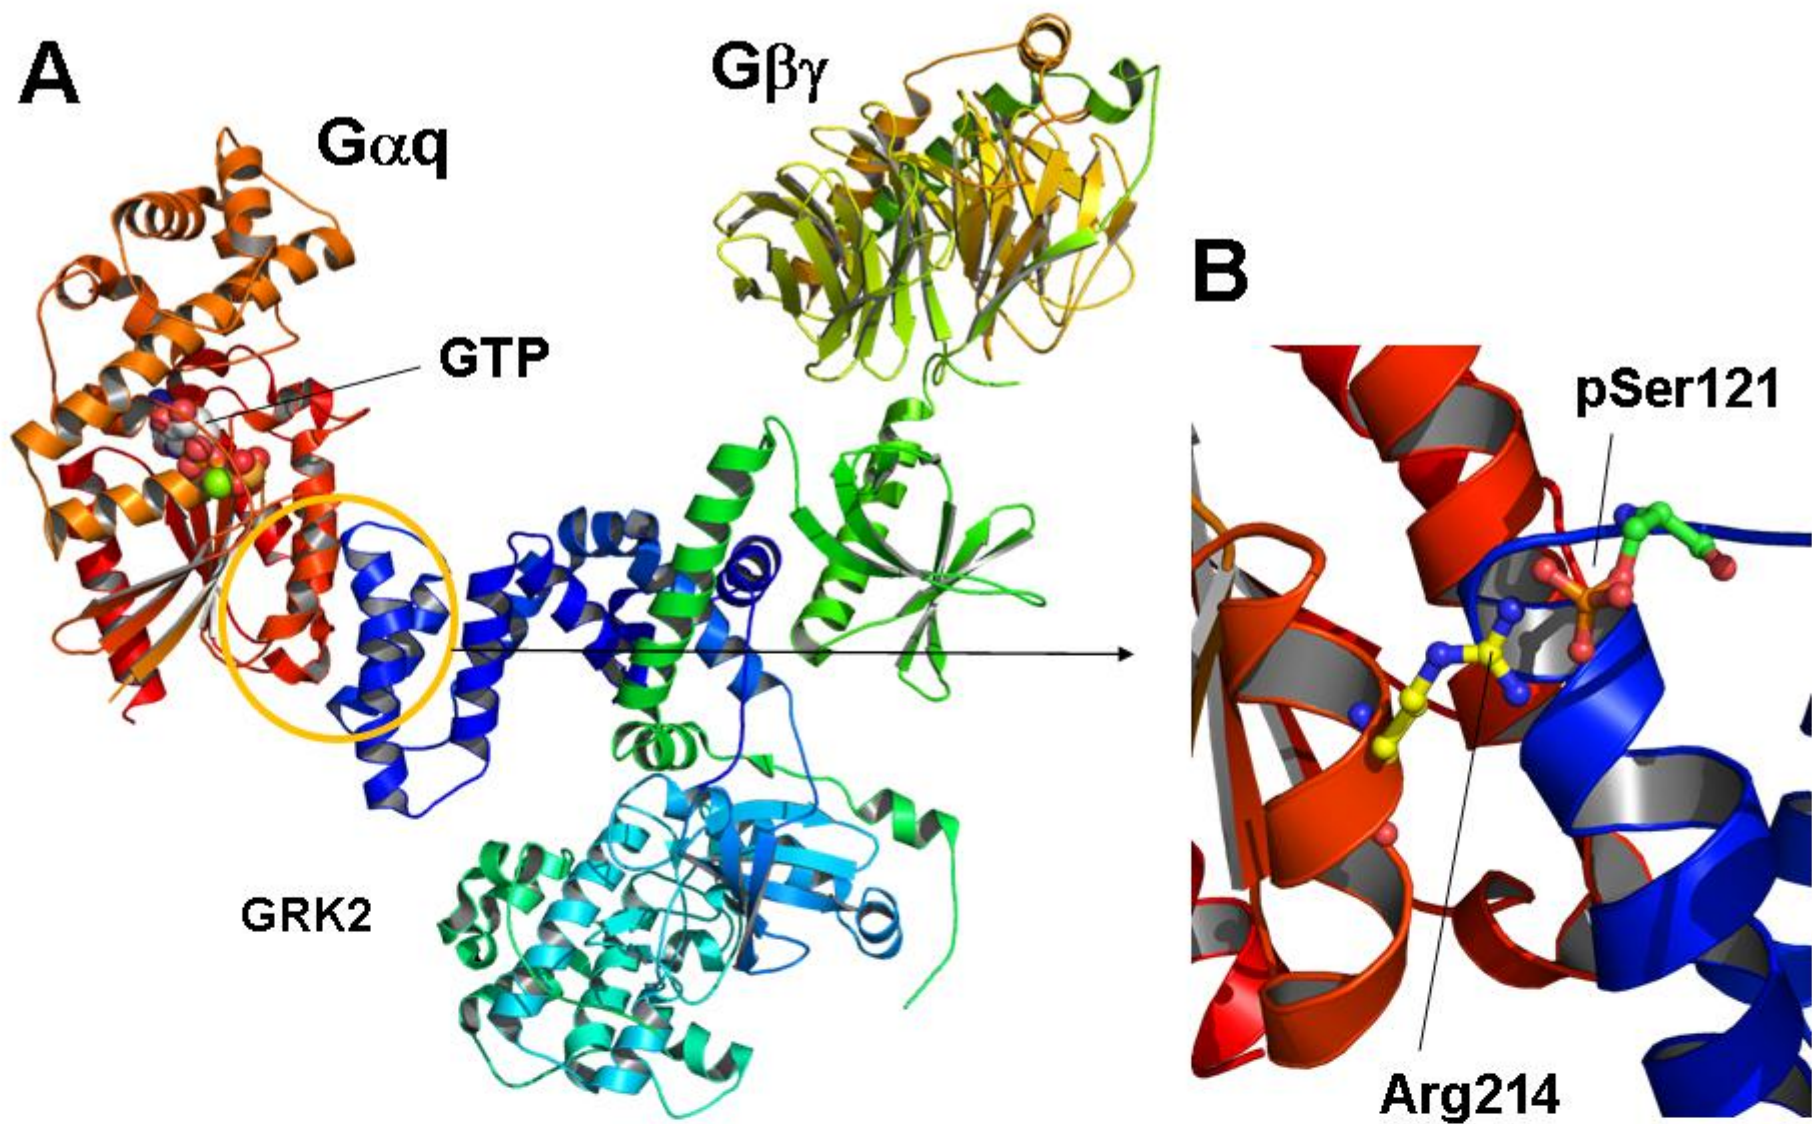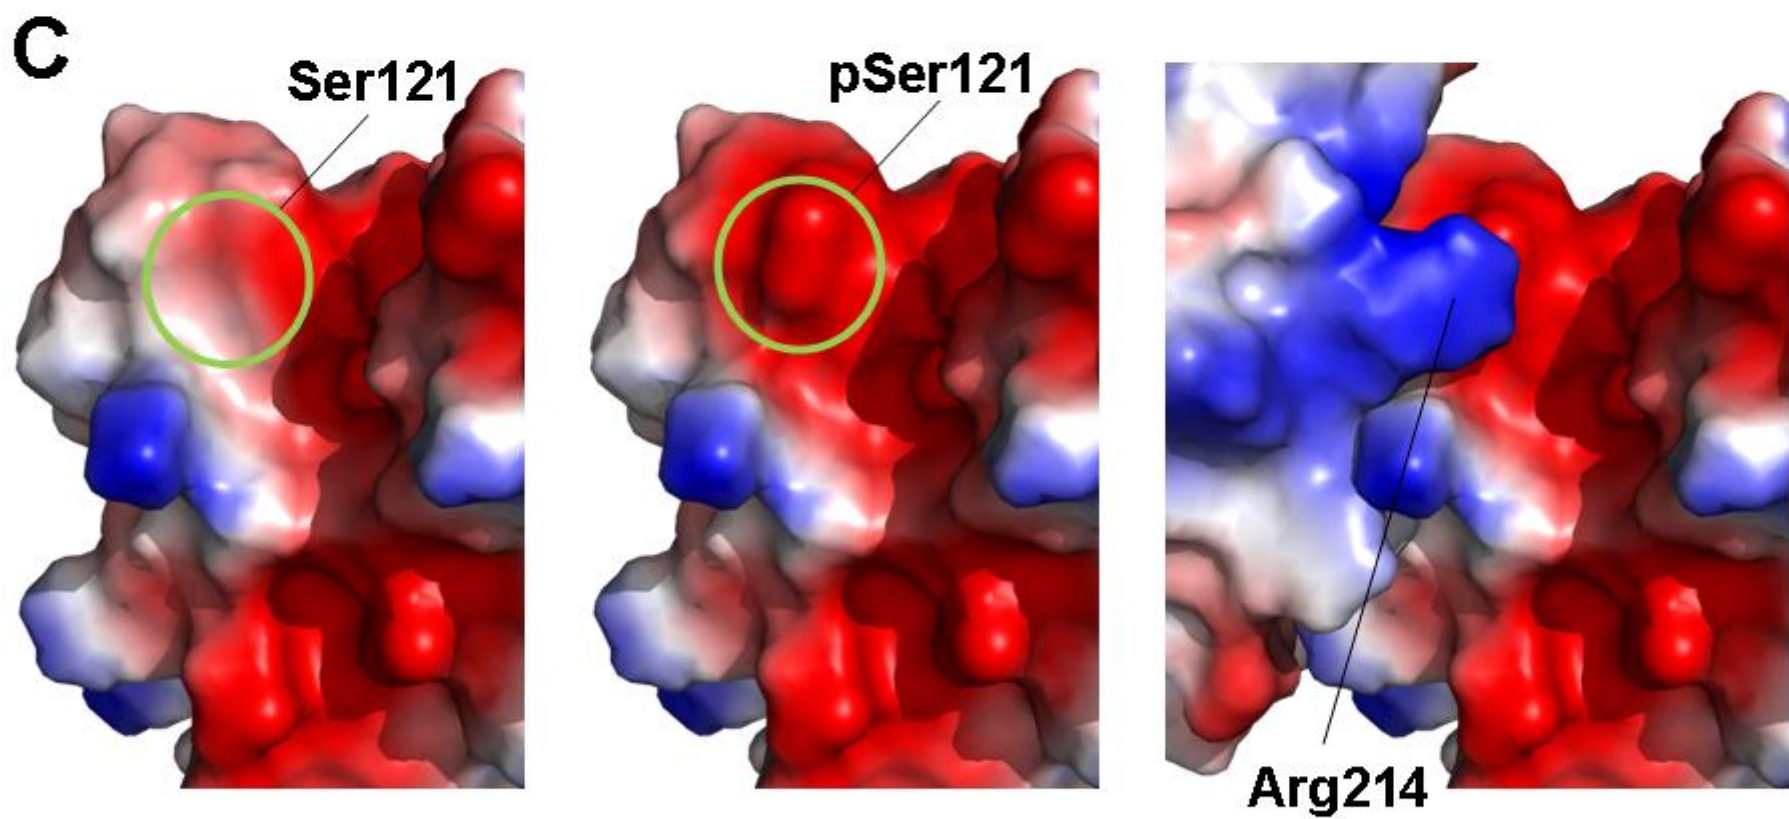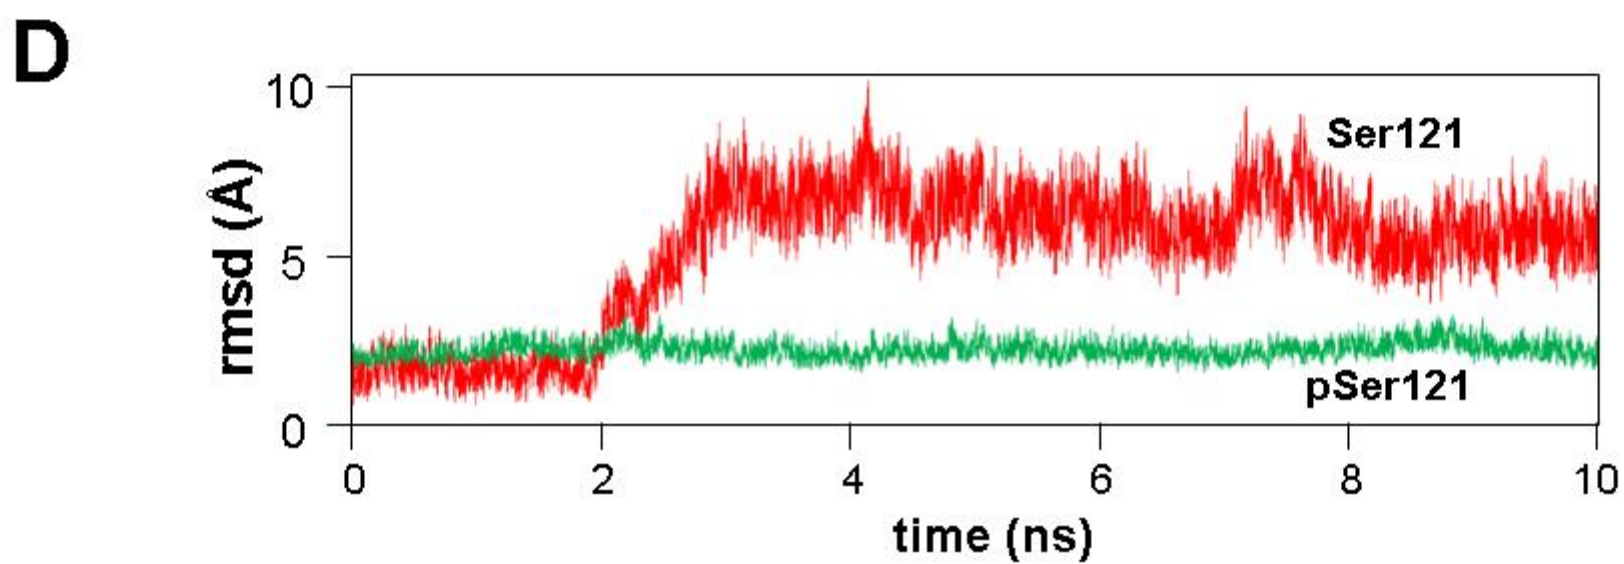

Supplement: 13336_2011_24_MOESM3_ESM.pdf [file 13336_2011_24_MOESM3_ESM.pdf]
